# Supplementary material for: Genetic Enhancement for Biotic Stress Resistance in Basmati Rice through Marker-Assisted Backcross Breeding
Source: MDPI journal article supplement (doi:10.3390/ijms242216081), 2023-11-08
Supplement: s1 [file s1]

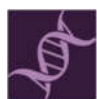

## Supplementary Material

# Genetic Enhancement for Biotic Stress Resistance in Basmati Rice through Marker-Assisted Backcross Breeding

Gagandeep Singh <sup>1,†</sup>, Niraj Singh <sup>1,†</sup>, Ranjith Kumar Ellur <sup>1</sup>, Alexander Balamurugan <sup>2</sup>, G. Prakash <sup>2</sup>, Rajeev Rathour <sup>3</sup>, Kalyan Kumar Mondal <sup>2</sup>, Prolay Kumar Bhowmick <sup>1</sup>, S. Gopala Krishnan <sup>1</sup>, Mariappan Nagarajan <sup>4</sup>, Rakesh Seth <sup>5</sup>, K. K. Vinod <sup>1</sup>, Varsha Singh <sup>1</sup>, Haritha Bollinedi <sup>1</sup> and Ashok Kumar Singh <sup>1,\*</sup>

<sup>1</sup> Division of Genetics, ICAR-Indian Agricultural Research Institute, New Delhi 110012, India; gagan.singh269@gmail.com (G.S.); niraj.singh37@gmail.com (N.S.); ranjith@iari.res.in or ranjithellur@gmail.com (R.K.E.); prolaysbhowmick@gmail.com (P.K.B.); gopal\_icar@yahoo.co.in (S.G.K.); kkvinodh@gmail.com (K.K.V.); varshagpb.10aug@gmail.com (V.S.); haritha.agrico@gmail.com (H.B.)

<sup>2</sup> Division of Plant Pathology, ICAR-Indian Agricultural Research Institute, New Delhi 110012, India; abalamurugan555@gmail.com (A.B.); prakashg.ganesan@gmail.com (G.P.); mondaliari@gmail.com (K.K.M.)

<sup>3</sup> Department of Agriculture Biotechnology, CSKHPKV, Palampur 176062, Himachal Pradesh, India; rathour72@gmail.com

<sup>4</sup> Rice Breeding and Genetics Research Centre, ICAR-Indian Agricultural Research Institute, Aduthurai 612101, Tamil Nadu, India; iariadt@gmail.com

<sup>5</sup> Regional Station, ICAR-Indian Agricultural Research Institute, Karnal 132001, Haryana, India; rseth101@gmail.com

\* Correspondence: aksingh@iari.res.in

† These authors contributed equally to this work.

**Supplementary table S1.** List of polymorphic markers between PB1509 and Pusa Basmati 1718, their location and the amplified fragment size

| Marker   | Position | Location (Mb) | Amplicon size (bp) |        |
|----------|----------|---------------|--------------------|--------|
|          |          |               | PB1509             | PB1718 |
| RM 1344  | 1        | 7.02          | 170                | 150    |
| RM 35    | 1        | 8.41          | 240                | 250    |
| RM 572   | 1        | 9.86          | 170                | 150    |
| RM 10854 | 1        | 14.04         | 400                | 700    |
| RM 5919  | 1        | 24.74         | 330                | 300    |
| RM 1152  | 1        | 30.09         | 280                | 270    |
| RM 11983 | 1        | 38.48         | 110                | 90     |

|            |    |       |     |     |
|------------|----|-------|-----|-----|
| RM 431     | 1  | 38.89 | 245 | 235 |
| RM 104     | 1  | 40.16 | 240 | 210 |
| RM 1067    | 1  | 42.91 | 240 | 310 |
| RM 12273   | 1  | 42.99 | 300 | 320 |
| RM 236     | 2  | 2.11  | 300 | 250 |
| HVSSR2-10  | 2  | 4.29  | 280 | 300 |
| RM 3732    | 2  | 4.4   | 150 | 140 |
| RM 6247    | 2  | 5.79  | 100 | 120 |
| RM 12718   | 2  | 6.5   | 200 | 250 |
| RM 12808   | 2  | 7.74  | 450 | 430 |
| RM 12811   | 2  | 7.77  | 200 | 210 |
| RM 12812   | 2  | 7.77  | 240 | 315 |
| RM 71      | 2  | 8.76  | 160 | 130 |
| RM 7144    | 2  | 8.81  | 100 | 130 |
| RM 452     | 2  | 9.56  | 270 | 250 |
| RM 13088   | 2  | 13.06 | 350 | 340 |
| RM 13114   | 2  | 13.95 | 240 | 220 |
| RM 13181   | 2  | 16.06 | 160 | 150 |
| RM 13217   | 2  | 16.91 | 320 | 300 |
| RM 13254   | 2  | 17.86 | 500 | 530 |
| RM 13316   | 2  | 19.05 | 250 | 280 |
| RM 1379    | 2  | 20.05 | 380 | 350 |
| RM 262     | 2  | 20.79 | 170 | 150 |
| RM 263     | 2  | 25.88 | 120 | 100 |
| RM 13672   | 2  | 26    | 140 | 130 |
| RM 5404    | 2  | 33.7  | 200 | 220 |
| RM 5460    | 2  | 33.79 | 130 | 150 |
| RM 208     | 2  | 35.16 | 180 | 160 |
| RM 561     | 2  | 35.93 | 160 | 180 |
| RM 175     | 3  | 3.84  | 200 | 190 |
| OSR 13     | 3  | 7.12  | 60  | 80  |
| RM 3646    | 3  | 21.79 | 180 | 200 |
| RM 15857   | 3  | 29.67 | 120 | 100 |
| RM 335     | 4  | 0.68  | 110 | 160 |
| RM 401     | 4  | 13.15 | 280 | 240 |
| RM 317     | 4  | 29.06 | 200 | 220 |
| RM 7293    | 5  | 7.42  | 150 | 140 |
| RM 169     | 5  | 7.49  | 170 | 200 |
| RM 18297   | 5  | 12.48 | 150 | 160 |
| RM 217     | 6  | 31.24 | 200 | 150 |
| RM 51      | 7  | 0.24  | 150 | 120 |
| RM 21311   | 7  | 8.69  | 680 | 700 |
| RM 336     | 7  | 21.81 | 240 | 210 |
| RM 455     | 7  | 22.35 | 80  | 165 |
| RM 447     | 8  | 26.54 | 80  | 120 |
| RGNMS 2921 | 8  | 29.82 | 200 | 215 |
| RM 6100    | 10 | 18.37 | 150 | 140 |
| RM 1108    | 10 | 18.71 | 120 | 110 |
| RM 147     | 10 | 21.02 | 80  | 100 |

|          |    |       |     |     |
|----------|----|-------|-----|-----|
| RM 590   | 10 | 23.11 | 135 | 125 |
| RM 26777 | 11 | 17.32 | 200 | 210 |
| RM 457   | 11 | 18.86 | 250 | 240 |
| RM 7443  | 11 | 28.23 | 135 | 145 |
| RM 20A   | 12 | 0.97  | 110 | 125 |
| RM 7619  | 12 | 4.83  | 185 | 150 |
| RM 27841 | 12 | 8.02  | 250 | 280 |
| RM 465   | 12 | 16.8  | 200 | 190 |
| RM 511   | 12 | 17.44 | 150 | 140 |
| RM 1261  | 12 | 17.57 | 130 | 160 |
| RM 277   | 12 | 18.32 | 140 | 130 |
| RM 1246  | 12 | 19.16 | 130 | 160 |
| RM 28277 | 12 | 19.45 | 260 | 250 |
| RM 519   | 12 | 19.97 | 140 | 110 |
| RM 463   | 12 | 22.16 | 200 | 210 |
| RM 3226  | 12 | 24.07 | 180 | 200 |
| RM 235   | 12 | 26.17 | 200 | 190 |

**Supplementary table S2.** List of polymorphic markers between PB1509 and P1927, their location and the amplified fragment size

| Marker    | Position | Location (Mb) | Amplicon size (bp) |       |
|-----------|----------|---------------|--------------------|-------|
|           |          |               | PB1509             | P1927 |
| RM 1344   | 1        | 7.02          | 170                | 150   |
| RM 35     | 1        | 8.41          | 240                | 250   |
| RM 572    | 1        | 9.86          | 170                | 150   |
| RM 24     | 1        | 18.93         | 150                | 170   |
| RM 11365  | 1        | 25            | 280                | 270   |
| RM 15857  | 1        | 27.62         | 120                | 100   |
| RM 11983  | 1        | 38.48         | 110                | 90    |
| RM 431    | 1        | 38.89         | 245                | 235   |
| RM 3482   | 1        | 39.71         | 150                | 200   |
| RM 104    | 1        | 40.16         | 240                | 210   |
| RM 12273  | 1        | 42.99         | 300                | 320   |
| HVSSR 2-1 | 2        | 0.12          | 300                | 280   |
| RM 154    | 2        | 1.08          | 200                | 180   |
| HVSSR2-10 | 2        | 4.29          | 280                | 300   |
| RM 6247   | 2        | 5.79          | 100                | 120   |
| RM 12811  | 2        | 7.77          | 200                | 210   |
| RM 7144   | 2        | 8.81          | 100                | 130   |
| RM 237    | 2        | 9.56          | 100                | 80    |
| RM 12718  | 2        | 13.06         | 200                | 250   |
| RM 13088  | 2        | 13.95         | 350                | 340   |
| RM 13114  | 2        | 14.92         | 240                | 220   |

|            |    |       |     |     |
|------------|----|-------|-----|-----|
| RM 13181   | 2  | 15.96 | 160 | 150 |
| RM 13217   | 2  | 17.86 | 320 | 300 |
| RM 13263   | 2  | 18.08 | 100 | 120 |
| RM 13254   | 2  | 19.05 | 500 | 530 |
| RM 262     | 2  | 20.27 | 170 | 150 |
| HVSSR 2-59 | 2  | 22.14 | 200 | 150 |
| RM 3275    | 2  | 22.45 | 190 | 240 |
| RM 263     | 2  | 25.86 | 120 | 100 |
| RM 1379    | 2  | 26    | 380 | 350 |
| RM 3730    | 2  | 30.1  | 140 | 160 |
| RM 7443    | 2  | 32.02 | 135 | 145 |
| RM 5404    | 2  | 33.67 | 200 | 220 |
| RM 5460    | 2  | 33.76 | 130 | 150 |
| RM 561     | 2  | 34.42 | 160 | 180 |
| RM 208     | 2  | 35.13 | 180 | 160 |
| RM 71      | 3  | 1.52  | 160 | 130 |
| RM 452     | 3  | 4.33  | 270 | 250 |
| OSR 13     | 3  | 7.12  | 60  | 80  |
| RM 13672   | 3  | 14.19 | 140 | 130 |
| RM 5919    | 3  | 29.67 | 330 | 300 |
| RM 335     | 4  | 0.68  | 110 | 140 |
| RM 1261    | 4  | 3.12  | 130 | 170 |
| RM 169     | 4  | 13.15 | 170 | 200 |
| RM 18297   | 4  | 16.63 | 150 | 160 |
| RM 175     | 5  | 7.49  | 200 | 190 |
| RM 7619    | 5  | 12.48 | 185 | 150 |
| RM 20A     | 5  | 20.9  | 110 | 125 |
| RM 217     | 6  | 4.18  | 200 | 150 |
| RM 317     | 6  | 17.57 | 200 | 220 |
| RM 51      | 7  | 0.34  | 150 | 120 |
| RM 21311   | 7  | 17.82 | 680 | 700 |
| RM 336     | 7  | 21.81 | 240 | 210 |
| RM 455     | 7  | 22.35 | 80  | 165 |
| RM 6022    | 7  | 29.39 | 100 | 110 |
| RM 12812   | 8  | 27.9  | 240 | 315 |
| RM 6100    | 10 | 0.31  | 150 | 140 |
| RM 457     | 10 | 2.62  | 250 | 240 |
| RM 6271    | 10 | 4.43  | 100 | 80  |
| RM 271     | 10 | 16.2  | 80  | 100 |
| RM 1108    | 10 | 18.71 | 120 | 110 |
| RM 147     | 10 | 20.94 | 80  | 100 |
| RM 3226    | 11 | 19.43 | 180 | 220 |
| RM 21      | 11 | 25.15 | 150 | 170 |
| RM 7110    | 11 | 26.45 | 190 | 200 |
| RM 28277   | 12 | 0.43  | 260 | 250 |
| RM 590     | 12 | 4.83  | 135 | 125 |
| RM 12692   | 12 | 7.43  | 200 | 190 |
| RM 465     | 12 | 12.83 | 200 | 190 |
| RM 511     | 12 | 17.39 | 150 | 140 |

|             |    |       |     |     |
|-------------|----|-------|-----|-----|
| RM 1246     | 12 | 19.15 | 130 | 160 |
| RM 519      | 12 | 19.9  | 140 | 110 |
| RM 28326    | 12 | 20.24 | 110 | 130 |
| RM 277      | 12 | 21.16 | 140 | 130 |
| HVSSR 12-36 | 12 | 21.16 | 300 | 280 |
| RM 463      | 12 | 22.15 | 200 | 210 |
| RM 235      | 12 | 26.17 | 200 | 190 |

**Supplementary table S3.** List of polymorphic markers between PB1509 and P1929, their location and the amplified fragment size

| Marker     | Position | Location (Mb) | Amplicon size (bp) |       |
|------------|----------|---------------|--------------------|-------|
|            |          |               | PB1509             | P1929 |
| RM 495     | 1        | 0.21          | 225                | 210   |
| RM 499     | 1        | 0.38          | 80                 | 90    |
| RM 246     | 1        | 27.33         | 130                | 120   |
| RM 1232    | 1        | 27.62         | 130                | 120   |
| RM 1152    | 1        | 30.09         | 270                | 260   |
| RM 11738   | 1        | 32.92         | 220                | 320   |
| RM 212     | 1        | 33.05         | 130                | 180   |
| RM 1067    | 1        | 42.91         | 220                | 260   |
| RM 237     | 1        | 43.27         | 140                | 130   |
| RM 6247    | 2        | 5.79          | 100                | 120   |
| RM 12692   | 2        | 6.09          | 180                | 160   |
| RM 12811   | 2        | 7.77          | 270                | 520   |
| RM 71      | 2        | 8.76          | 140                | 120   |
| RM 7144    | 2        | 8.81          | 90                 | 120   |
| RM 452     | 2        | 9.56          | 210                | 200   |
| RM 1178    | 2        | 14.01         | 325                | 250   |
| HV 2-45    | 2        | 17.08         | 200                | 210   |
| RGNMS 2921 | 2        | 19.65         | 190                | 210   |
| RM 262     | 2        | 20.8          | 160                | 150   |
| RM 263     | 2        | 25.88         | 120                | 100   |
| RM 13672   | 2        | 26            | 180                | 170   |
| HV 2-85    | 2        | 35.36         | 100                | 130   |
| RM 138     | 2        | 35.68         | 235                | 225   |
| RM 6139    | 2        | 35.83         | 325                | 310   |
| RM 3872    | 3        | 6.82          | 125                | 135   |
| RM 15002   | 3        | 14.19         | 560                | 570   |
| RM 3646    | 3        | 21.79         | 140                | 150   |
| RM 16      | 3        | 23.12         | 180                | 200   |
| RM 15613   | 3        | 25.77         | 290                | 300   |
| RM 520     | 3        | 30.92         | 260                | 250   |
| RM 3867    | 3        | 31.75         | 95                 | 110   |
| RM 1352    | 3        | 32.34         | 235                | 210   |
| RM 55      | 3        | 36.41         | 220                | 235   |

|             |    |       |     |     |
|-------------|----|-------|-----|-----|
| RM 16450    | 4  | 4.99  | 400 | 215 |
| RM 16611    | 4  | 11.7  | 90  | 80  |
| RM 307      | 4  | 13.15 | 190 | 130 |
| RM 16745    | 4  | 16.63 | 190 | 180 |
| RM 317      | 4  | 29.06 | 150 | 160 |
| RM 19260    | 6  | 0.57  | 590 | 290 |
| RM 8060     | 6  | 0.72  | 270 | 300 |
| RM 19268    | 6  | 0.81  | 335 | 350 |
| RM 19285    | 6  | 1.09  | 210 | 190 |
| RM 19301    | 6  | 1.35  | 110 | 120 |
| RM 1369     | 6  | 1.5   | 270 | 230 |
| RM 1261     | 6  | 17.57 | 300 | 290 |
| RM 162      | 6  | 24.04 | 230 | 250 |
| RM 217      | 6  | 31.24 | 300 | 290 |
| RM 6050     | 7  | 22.97 | 180 | 160 |
| RM 1335     | 7  | 28.24 | 110 | 120 |
| RM 152      | 8  | 0.68  | 160 | 150 |
| RM 1235     | 8  | 1.21  | 130 | 140 |
| RM 25       | 8  | 4.38  | 130 | 150 |
| RM 316      | 9  | 1.02  | 200 | 210 |
| RM 444      | 9  | 5.92  | 190 | 150 |
| RM 23899    | 9  | 6.94  | 200 | 240 |
| RM 6920     | 9  | 6.95  | 180 | 200 |
| RM 23928    | 9  | 7.52  | 310 | 230 |
| RM 23982    | 9  | 8.54  | 160 | 200 |
| RM 257      | 9  | 17.71 | 150 | 200 |
| RM 288      | 9  | 18.56 | 130 | 120 |
| RM 160      | 9  | 19.75 | 130 | 100 |
| RM 205      | 9  | 22.72 | 130 | 150 |
| RM 222      | 10 | 2.62  | 200 | 190 |
| RM 6100     | 10 | 10.89 | 145 | 130 |
| RM 467      | 10 | 13.49 | 190 | 200 |
| RM 147      | 10 | 21.02 | 110 | 120 |
| RM 590      | 10 | 23.11 | 160 | 150 |
| RM 3185     | 11 | 9.12  | 135 | 140 |
| RM 26499    | 11 | 10.9  | 125 | 110 |
| RM 26621    | 11 | 14.36 | 260 | 350 |
| RM 7226     | 11 | 14.51 | 185 | 170 |
| RM 287      | 11 | 17.23 | 120 | 110 |
| RM 1341     | 11 | 19.43 | 150 | 170 |
| RM 415      | 12 | 0.43  | 215 | 200 |
| RM 20A      | 12 | 0.97  | 160 | 180 |
| RM 247      | 12 | 3.19  | 170 | 130 |
| RM 28032    | 12 | 13.64 | 250 | 260 |
| RM 28059    | 12 | 14.53 | 380 | 390 |
| HVSSR 12-36 | 12 | 21.16 | 380 | 330 |
| RGNMS 3781  | 12 | 21.23 | 180 | 210 |
| RM 235      | 12 | 26.17 | 130 | 110 |
| RM 19       | 12 | 26.6  | 220 | 250 |

**Supplementary table S4.** List of polymorphic markers between PB1509 and Tetep, their location and the amplified fragment size

| Marker     | Position | Location (Mb) | Amplicon size (bp) |       |
|------------|----------|---------------|--------------------|-------|
|            |          |               | PB1509             | Tetep |
| RM 499     | 1        | 0.38          | 80                 | 90    |
| RM 22      | 1        | 1.5           | 140                | 150   |
| RM 8068    | 1        | 1.66          | 210                | 270   |
| RM 84      | 1        | 11.56         | 130                | 150   |
| RM 140     | 1        | 12.3          | 310                | 325   |
| RM 24      | 1        | 18.98         | 160                | 180   |
| RM 5919    | 1        | 24.73         | 280                | 270   |
| RM 246     | 1        | 27.33         | 130                | 100   |
| RM 1152    | 1        | 30.09         | 270                | 260   |
| RM 11738   | 1        | 32.92         | 220                | 250   |
| RM 12204   | 1        | 41.8          | 160                | 180   |
| RM 1067    | 1        | 42.91         | 220                | 260   |
| RM 154     | 2        | 1.08          | 180                | 165   |
| RM 12415   | 2        | 1.76          | 280                | 290   |
| RM 6247    | 2        | 5.79          | 100                | 120   |
| RM 12811   | 2        | 7.77          | 270                | 520   |
| RM 71      | 2        | 8.76          | 140                | 120   |
| RM 7144    | 2        | 8.81          | 240                | 290   |
| RM 5699    | 2        | 8.98          | 240                | 260   |
| RM 1178    | 2        | 14.01         | 325                | 250   |
| HV 2-45    | 2        | 17.08         | 200                | 210   |
| RGNMS 2921 | 2        | 19.65         | 190                | 210   |
| RM 13672   | 2        | 26            | 180                | 160   |
| RM 3730    | 2        | 26.26         | 150                | 170   |
| RM 221     | 2        | 27.62         | 135                | 150   |
| HV 2-73    | 2        | 28.2          | 200                | 190   |
| RM 525     | 2        | 28.26         | 140                | 100   |
| RM 3275    | 2        | 30.1          | 165                | 180   |
| RM 112     | 2        | 32.02         | 90                 | 80    |
| RM 208     | 2        | 35.16         | 180                | 160   |
| HV 2-85    | 2        | 35.36         | 100                | 130   |
| RM 138     | 2        | 35.68         | 235                | 225   |
| OSR13      | 3        | 0.79          | 95                 | 135   |
| RM 3872    | 3        | 6.82          | 125                | 135   |
| RM 157A    | 3        | 9.46          | 130                | 140   |
| RM 15002   | 3        | 14.19         | 560                | 570   |
| RM 16      | 3        | 23.12         | 180                | 200   |
| RM 168     | 3        | 27.89         | 150                | 140   |
| RM 520     | 3        | 30.92         | 260                | 250   |
| RM 3867    | 3        | 31.75         | 95                 | 110   |

|            |   |       |     |     |
|------------|---|-------|-----|-----|
| RM 1352    | 3 | 32.34 | 235 | 250 |
| RM 514     | 3 | 35.07 | 260 | 230 |
| RM 570     | 3 | 35.38 | 250 | 260 |
| HVSSR3-93  | 3 | 36    | 240 | 220 |
| RM 55      | 3 | 36.41 | 220 | 235 |
| RM 16294   | 4 | 0.92  | 350 | 280 |
| RM 7200    | 4 | 4.03  | 215 | 200 |
| RM 16450   | 4 | 4.99  | 400 | 340 |
| RM 3471    | 4 | 6.31  | 140 | 160 |
| RM 307     | 4 | 13.15 | 190 | 130 |
| HV4-28     | 4 | 21.28 | 370 | 350 |
| RM 3288    | 4 | 27.35 | 190 | 200 |
| RM 2441    | 4 | 27.86 | 150 | 160 |
| RM 317     | 4 | 29.06 | 150 | 160 |
| RM 3687    | 4 | 31.29 | 170 | 160 |
| RM 17512   | 4 | 31.83 | 285 | 275 |
| HVSSR04-49 | 4 | 33.27 | 380 | 350 |
| RM 131     | 4 | 34.61 | 160 | 150 |
| RM 507     | 5 | 0.07  | 200 | 180 |
| RM 6271    | 5 | 4.43  | 85  | 75  |
| RM 169     | 5 | 7.49  | 160 | 190 |
| RM 581     | 5 | 9.1   | 135 | 150 |
| RM 18297   | 5 | 12.48 | 110 | 120 |
| RM 146     | 5 | 17.96 | 350 | 360 |
| RM 31      | 5 | 28.61 | 160 | 145 |
| RM 19260   | 6 | 0.57  | 590 | 290 |
| RM 8060    | 6 | 0.72  | 270 | 300 |
| RM 19268   | 6 | 0.81  | 335 | 350 |
| RM 1369    | 6 | 1.5   | 270 | 260 |
| RM 111     | 6 | 5.09  | 280 | 270 |
| RM 136     | 6 | 8.75  | 65  | 75  |
| RM 1261    | 6 | 17.57 | 170 | 160 |
| RM 275     | 6 | 24.32 | 250 | 260 |
| RM 217     | 6 | 31.24 | 150 | 160 |
| RM 8035    | 7 | 14.06 | 95  | 110 |
| RM 2       | 7 | 16.02 | 170 | 160 |
| RM 7110    | 7 | 16.8  | 190 | 200 |
| RM 11      | 7 | 19.25 | 130 | 150 |
| RM 6050    | 7 | 22.97 | 140 | 155 |
| RM 234     | 7 | 25.42 | 140 | 130 |
| RM 420     | 7 | 29.39 | 190 | 200 |
| RM 25      | 8 | 4.38  | 130 | 150 |
| RM 44      | 8 | 11.76 | 110 | 100 |
| RM 3281    | 8 | 13.36 | 140 | 150 |
| RM 23073   | 8 | 19.57 | 160 | 380 |
| RM 284     | 8 | 21.13 | 150 | 135 |
| RM 23741   | 9 | 2.68  | 400 | 410 |
| RM 23899   | 9 | 6.94  | 200 | 240 |
| RM 6920    | 9 | 6.95  | 140 | 150 |



|             |    |       |     |     |
|-------------|----|-------|-----|-----|
| RGNMS3037   | 9  | 7.2   | 300 | 310 |
| RM 23928    | 9  | 7.52  | 310 | 280 |
| RM 105      | 9  | 12.55 | 125 | 135 |
| RM 24181    | 9  | 12.56 | 115 | 100 |
| RM 24183    | 9  | 12.6  | 330 | 320 |
| HV09-25     | 9  | 14.74 | 380 | 360 |
| RM 3700     | 9  | 15.42 | 150 | 140 |
| HV9-36      | 9  | 16.81 | 310 | 335 |
| RM 160      | 9  | 19.75 | 130 | 100 |
| RM 201      | 9  | 20.17 | 150 | 165 |
| RGNMS3253   | 10 | 0.31  | 330 | 360 |
| RM 271      | 10 | 4.9   | 110 | 120 |
| RM 6100     | 10 | 10.89 | 145 | 130 |
| RM 1375     | 10 | 16.2  | 160 | 180 |
| RGNMS3297   | 10 | 16.26 | 310 | 290 |
| RM 184      | 10 | 16.35 | 210 | 200 |
| RM 1108     | 10 | 18.71 | 135 | 125 |
| RM 171      | 10 | 19.04 | 350 | 340 |
| RM 1108     | 10 | 19.23 | 125 | 115 |
| RM 147      | 10 | 21.02 | 110 | 120 |
| RM 1812     | 11 | 2.41  | 135 | 155 |
| RM 332      | 11 | 2.84  | 160 | 150 |
| RM 552      | 11 | 4.85  | 170 | 180 |
| RM 26323    | 11 | 7.37  | 160 | 175 |
| RM 536      | 11 | 8.89  | 210 | 230 |
| RM 26499    | 11 | 10.9  | 140 | 125 |
| RM 26544    | 11 | 11.8  | 170 | 160 |
| RM 3428     | 11 | 13.48 | 150 | 160 |
| RM 26621    | 11 | 14.36 | 260 | 350 |
| RM 7226     | 11 | 14.51 | 180 | 190 |
| RM 2110     | 11 | 19.22 | 150 | 110 |
| RM 1341     | 11 | 19.43 | 150 | 170 |
| RM 4601     | 11 | 22.25 | 120 | 170 |
| RM 7443     | 11 | 28.23 | 130 | 120 |
| RM 415      | 12 | 0.43  | 215 | 200 |
| RM 20A      | 12 | 0.97  | 160 | 180 |
| RM 247      | 12 | 3.19  | 170 | 130 |
| RM 491      | 12 | 3.58  | 250 | 360 |
| RM 28032    | 12 | 13.64 | 250 | 260 |
| RM 1261     | 12 | 17.57 | 180 | 170 |
| RM 6022     | 12 | 19.95 | 100 | 90  |
| HVSSR 12-36 | 12 | 21.16 | 380 | 330 |
| RGNMS 3781  | 12 | 21.23 | 180 | 210 |
| RM 235      | 12 | 26.17 | 130 | 140 |
| RM 19       | 12 | 26.6  | 220 | 250 |

**Supplementary table S5.** Blight resistance evaluation of the developed NILs with *Xoo* Race 4

| <b>NIL</b> | <b>Genotype</b>               | <b>Genes</b>          | <b>Lesion length (in cm)</b> |
|------------|-------------------------------|-----------------------|------------------------------|
| G11        | Pusa 3037-1-44-3-164-20-249-2 | <i>xa13+Xa21</i>      | 3.49±0.80                    |
| G12        | Pusa 3037-1-44-3-164-21-255-1 | <i>xa13+Xa21</i>      | 2.04± 0.38                   |
| G13        | Pusa 3037-1-44-3-164-21-256-4 | <i>xa13+Xa21</i>      | 2.85± 0.52                   |
| G14        | Pusa 3037-1-45-5-165-22-259-4 | <i>xa13+Xa21</i>      | 1.68± 0.44                   |
| G15        | Pusa 3054-2-47-7-166-24-261-1 | <i>Xa38</i>           | 0.45± 0.13                   |
| G16        | Pusa 3054-2-47-7-166-24-261-2 | <i>Xa38</i>           | 2.56 ±0.61                   |
| G17        | Pusa 3054-2-47-7-166-24-261-3 | <i>Xa38</i>           | 2.76 ±0.80                   |
| G18        | Pusa 3054-2-47-7-166-24-262-2 | <i>Xa38</i>           | 0.33± 0.06                   |
| G19        | Pusa 3054-2-47-7-166-24-262-3 | <i>Xa38</i>           | 1.12± 0.47                   |
| G20        | Pusa 3122-27-15-165-2         | <i>xa13+Xa21+Xa38</i> | 0.49± 0.11                   |
| G21        | Pusa 3122-27-16-166-1         | <i>xa13+Xa21+Xa38</i> | 0.25±0.05                    |
| G22        | Pusa 3124-37-17-168-4         | <i>Xa38+Pi9+Pib</i>   | 0.38± 0.04                   |
| G23        | Pusa 3124-37-18-175-1         | <i>Xa38+Pi9+Pib</i>   | 0.36± 0.08                   |
| G24        | Pusa 3124-38-19-176-5         | <i>Xa38+Pi9+Pib</i>   | 0.23± 0.01                   |
| G25        | Pusa 3124-40-21-179-4         | <i>Xa38+Pi9+Pib</i>   | 0.21± 0.00                   |
| G26        | Pusa 3124-40-22-180-2         | <i>Xa38+Pi9+Pib</i>   | 0.43±0.09                    |
| -          | PB1509                        | -                     | 14.37± 0.71                  |
| -          | PB1718                        | <i>xa13+Xa21</i>      | 1.77± 0.45                   |
| -          | P1927                         | <i>Xa38</i>           | 0.61± 0.17                   |
